# Supplementary material for: A Fast and Accurate Method to Identify and Quantify Enzymes in Brush-Border Membranes: In Situ Hydrolysis Followed by Nano LC-MS/MS
Source: PubMed Central journal article supplement (PMC7189658; doi:10.3390/mps3010015), 2020-02-10
Supplement: mps-03-00015-s001.pdf [file mps-03-00015-s001.pdf]

Protocol

# A Fast and Accurate Method to Identify and Quantify Enzymes in Brush-Border Membranes: In Situ Hydrolysis Followed by Nano LC-MS/MS

**Antonio Brun** <sup>1,2,†</sup>, **Melisa E. Magallanes** <sup>1,†</sup>, **Carlos Martínez del Río** <sup>3</sup>, **Gregory A. Barrett-Wilt** <sup>4</sup>, **William H. Karasov** <sup>4</sup> and **Enrique Caviedes-Vidal** <sup>1,5,6,\*</sup>

<sup>1</sup> Instituto Multidisciplinario de Investigaciones Biológicas de San Luis (IMIBIO-SL), Consejo Nacional de Investigaciones Científicas y Técnicas (CONICET), 5700 San Luis, Argentina; bruntonio@gmail.com (A.B.); melisa.eliana.magallanes@gmail.com (M.E.M.)

<sup>2</sup> Facultad de Ciencias de la Salud. Universidad Nacional de San Luis, 5700 San Luis, Argentina

<sup>3</sup> Department of Zoology and Physiology, University of Wyoming, Laramie, WY 82071, USA; CmDelRio@uwyo.edu

<sup>4</sup> Mass Spectrometry and Proteomics Facility, Biotechnology Center, University of Wisconsin-Madison, WI 53706, USA; barrettwilt@wisc.edu (G.B.-W.); wkarasov@wisc.edu (W.H.K.)

<sup>5</sup> Department of Forest and Wildlife Ecology, University of Wisconsin-Madison, Madison, WI 53706, USA

<sup>6</sup> Departamento de Biología, Universidad Nacional de San Luis (UNSL), 5700 San Luis, Argentina

† These authors contributed equally to this work

\* Correspondence: enrique.caviedes@gmail.com (E.C.-V)

Received: 7 December 2019; Accepted: 3 February 2020; Published: date

**Supplementary Table S1.** Proteins identified by nano-liquid chromatography coupled to mass spectrometry in the slices cut from gels incubated with maltose and sucrose. Quantitative value and coverage of proteins in the analyzed sample was determined using Scaffold software package (version 4.3.2, Proteome Software Inc., Portland, OR). The % coverage refers to the percentage of the protein sequence covered by identified peptides. Proteins were included if their identity could be established at greater than 99.0% probability with a 1% false discovery rate and containing at least 5 identified peptides.

| Identified Proteins = 32                              | UniProt accession Number | Molecular mass (kDa) | Maltose substrate   |            |                     |            | Sucrose substrate   |            |                     |            |
|-------------------------------------------------------|--------------------------|----------------------|---------------------|------------|---------------------|------------|---------------------|------------|---------------------|------------|
|                                                       |                          |                      | Mouse 1             |            | Mouse 2             |            | Mouse 1             |            | Mouse 2             |            |
|                                                       |                          |                      | Quantitative Value* | Coverage % | Quantitative Value* | Coverage % | Quantitative Value* | Coverage % | Quantitative Value* | Coverage % |
| Sucrase-isomaltase                                    | F8VQM5                   | 209                  | 104                 | 23         | 42                  | 3          | 100                 | 35         | 81                  | 6          |
| Maltase-glucoamylase                                  | B5THE2                   | 209                  | 56                  | 15         | 94                  | 5          | 83                  | 31         | 38                  | 4          |
| Aminopeptidase N                                      | P97449                   | 110                  | 25                  | 12         | 42                  | 2          | 49                  | 39         | 49                  | 5          |
| Actin                                                 | P63260                   | 42                   | 30                  | 40         | 10                  | 4          | 16                  | 53         | 38                  | 7          |
| Myosin-14                                             | K3W4R2                   | 229                  | 23                  | 7          | -                   | -          | 18                  | 18         | -                   | -          |
| Sodium/potassium- transporting ATPase subunit alpha-1 | Q8VDN2                   | 113                  | 20                  | 22         | 21                  | 3          | 13                  | 22         | 59                  | 15         |
| Sodium/glucose cotransporter 1                        | Q8C3K6                   | 73                   | 8                   | 12         | -                   | -          | 15                  | 25         | -                   | -          |
| Keratin, type I cytoskeletal 19                       | P19001                   | 45                   | 22                  | 40         | -                   | -          | 19                  | 61         | -                   | -          |
| ATP synthase subunit alpha                            | D3Z6F5                   | 55                   | 4                   | 12         | 73                  | 16         | 9                   | 25         | 76                  | 18         |
| Keratin, type II cytoskeletal 8                       | P11679                   | 55                   | 10                  | 11         | -                   | -          | 19                  | 43         | -                   | -          |
| Histone H2B type 1-F/J/L                              | P10853                   | 14                   | 10                  | 30         | -                   | -          | 18                  | 42         | -                   | -          |
| Voltage-dependent anion- selective channel protein 1  | Q60932                   | 32                   | 13                  | 26         | 10                  | 3          | 15                  | 49         | 11                  | 3          |
| Glutamyl aminopeptidase                               | P16406                   | 108                  | 9                   | 8          | -                   | -          | 12                  | 21         | -                   | -          |
| ATP synthase subunit beta, mitochondrial              | P56480                   | 56                   | 10                  | 23         | 10                  | 5          | 16                  | 33         | 11                  | 5          |
| Fc fragment of IgG-binding protein                    | E9Q9C6                   | 275                  | 7                   | 5          | -                   | -          | 6                   | 5          | -                   | -          |
| Plectin                                               | Q9QXS1                   | 534                  | 4                   | 2          | -                   | -          | 5                   | 3          | -                   | -          |
| Dipeptidyl peptidase 4                                | P28843                   | 87                   | 3                   | 4          | -                   | -          | 7                   | 16         | -                   | -          |
| Lactase                                               | F8VPT3                   | 218                  | 1                   | 1          | -                   | -          | 5                   | 5          | -                   | -          |
| Voltage-dependent anion- selective channel protein 2  | G3UX26                   | 30                   | 9                   | 22         | -                   | -          | 5                   | 34         | -                   | -          |
| Mitochondrial amidoxime reducing component 2          | Q922Q1                   | 38                   | 3                   | 12         | -                   | -          | 3                   | 15         | -                   | -          |
| Amine oxidase [flavin- containing] A                  | Q64133                   | 60                   | 3                   | 7          | -                   | -          | 3                   | 11         | -                   | -          |

Table S1. Cont.

|                                                         |        |     |   |    |    |   |   |    |    |    |
|---------------------------------------------------------|--------|-----|---|----|----|---|---|----|----|----|
| Histone H4                                              | P62806 | 11  | 5 | 39 | -  | - | 4 | 52 | -  | -  |
| Meprin A subunit beta                                   | Q61847 | 80  | 3 | 10 | -  | - | 5 | 12 | -  | -  |
| Villin-1                                                | Q62468 | 93  | 3 | 5  | -  | - | 2 | 7  | -  | -  |
| Neutral and basic amino acid<br>transport protein rBAT  | Q91WV7 | 78  | 2 | 4  | -  | - | 3 | 8  | -  | -  |
| 4F2 cell-surface antigen heavy chain                    | P10852 | 58  | 2 | 7  | -  | - | 4 | 16 | -  | -  |
| ATP synthase subunit gamma                              | Q8C2Q8 | 30  | - | -  | 21 | 8 | - | -  | 16 | 20 |
| Sodium/potassium- transporting<br>ATPase subunit beta-1 | P14094 | 35  | 2 | 9  | -  | - | 3 | 16 | -  | -  |
| ADP/ATP translocase 2                                   | P51881 | 33  | 2 | 8  | -  | - | 2 | 18 | -  | -  |
| Cingulin                                                | D3YUW7 | 136 | 1 | 1  | -  | - | 3 | 4  | -  | -  |
| ATP-dependent translocase ABCB1                         | P21447 | 141 | 1 | 1  | -  | - | 2 | 5  | -  | -  |
| Cytochrome b-c1 complex subunit 2,<br>mitochondrial     | Q9DB77 | 48  | 1 | 2  | -  | - | 2 | 14 | -  | -  |

Reference. \*: normalized total spectra
